# Supplementary material for: MEGaNorm: Normative Modeling of MEG Brain Oscillations Across the Human Lifespan
Source: Research Square preprint supplement (doi:10.21203/rs.3.rs-6725132/v1), 2025-07-21
Supplement: Supplementary file 1 [file 241aa7b3fedd21475e2f51b4.pdf]

# Supplementary Information

## MEGaNorm: Normative Modeling of MEG Brain Oscillations

### Across the Human Lifespan

Mohammad Zamanzadeh<sup>1</sup>   Ymke Verduyn<sup>1</sup>   Augustijn de Boer<sup>2,3</sup>   Tomas Ros<sup>4</sup>  
Thomas Wolfers<sup>5,6</sup>   Richard Dinga<sup>1</sup>   Marie Šafář Postma<sup>1</sup>  
Andre F. Marquand<sup>2,3</sup>   Marijn van Wingerden<sup>1</sup>   Seyed Mostafa Kia<sup>1,2,7</sup>

<sup>1</sup> Department of Cognitive Science and Artificial Intelligence, Tilburg University, Tilburg, the Netherlands.

<sup>2</sup> Donders Institute for Cognition, Brain and Behavior, Radboud University, Nijmegen, The Netherlands

<sup>3</sup> Department of Cognitive Neuroscience, Radboud University Medical Center, Nijmegen, The Netherlands

<sup>4</sup> CIBM Center for Biomedical Imaging, University of Geneva, Geneva, Switzerland

<sup>5</sup> Department of Psychiatry and Psychotherapy, University Hospital Tübingen, Tübingen, Germany

<sup>6</sup> German Center for Mental Health, University of Tübingen, Tübingen, Germany

<sup>7</sup> Department of Psychiatry, UMC Utrecht Brain Center, University Medical Center, Utrecht, the Netherlands

May 22, 2025

## Supplementary Methods

### The SHASH likelihood

The SHASH distribution [1] incorporates four key parameters—mean ( $\mu$ ), variance ( $\sigma$ ), skewness ( $\epsilon$ ), and kurtosis ( $\delta$ ), when defining the likelihood in the Bayesian modeling framework [2]. Unlike the Gaussian distribution ( $X \sim N(\mu, \sigma)$ ), which depends solely on the location  $\mu$  and scale  $\sigma$  parameters, the SHASH distribution models also the shape of the distribution by applying an inverse sinh-arcsinh transformation to samples drawn from a standard Gaussian distribution ( $Z \sim N(0, 1)$ ):

$$\xi_{\epsilon, \delta}^{-1}(z) = \sinh \left( \frac{\sinh^{-1}(z) + \epsilon}{\delta} \right)$$

Here,  $z$  represents samples from a standard Gaussian distribution, and the transformation results in a SHASH distribution  $S(\epsilon, \delta)$ , where the parameters  $\epsilon$  and  $\delta$  control the skewness and kurtosis of the distribution, respectively. Specifically,  $\epsilon$  adjusts the asymmetry of the distribution (skewness), while  $\delta$  governs

the tail behavior (kurtosis), allowing the SHASH distribution to model a wide range of non-Gaussian data shapes. The location ( $\mu$ ) and scale ( $\sigma$ ) of the distribution are also incorporated as follows:

$$\Omega = \xi_{\epsilon, \delta}^{-1}(Z)\sigma + \mu$$

where  $\Omega \sim \mathcal{S}(\mu, \sigma, \epsilon, \delta)$ . Together, the four parameters enable the SHASH distribution to accurately capture complex characteristics of data distribution, such as non-Gaussianity, and varying skewness or kurtosis.

## Excluded participants

Some participants were excluded from the analysis for the following reasons: missing demographic information, missing magnetoencephalography (MEG) recordings, and failure to fit models using the spectral parameterization algorithm. The table below summarizes the number of excluded participants per dataset:

**Supplementary Table 1:** Number of excluded participants per dataset.

| Scanner site | Number of excluded participants |
|--------------|---------------------------------|
| BTH          | 0                               |
| CamCAN       | 20                              |
| NIMH         | 0                               |
| OMEGA        | 2                               |
| HCP          | 6                               |
| MOUS         | 5                               |

## Supplementary Results

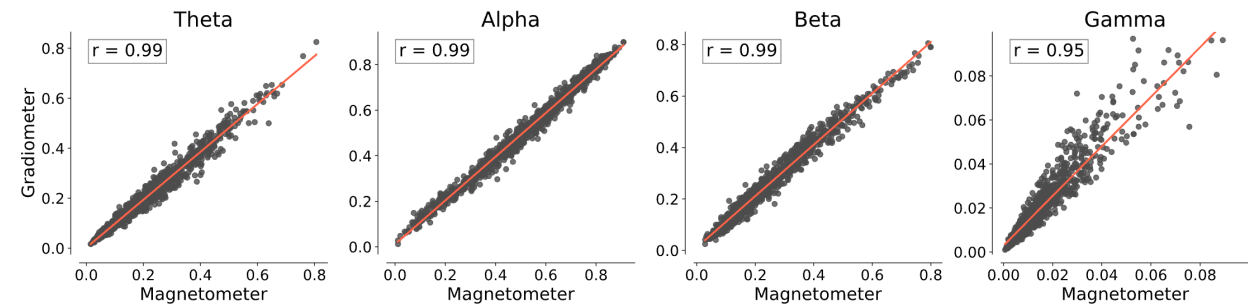

**Supplementary Figure 1:** The relative power of canonical frequency bands exhibited a high Pearson correlation across magnetometers and gradiometers. All Pearson correlation coefficients ( $r$ ) were greater than 0.95.

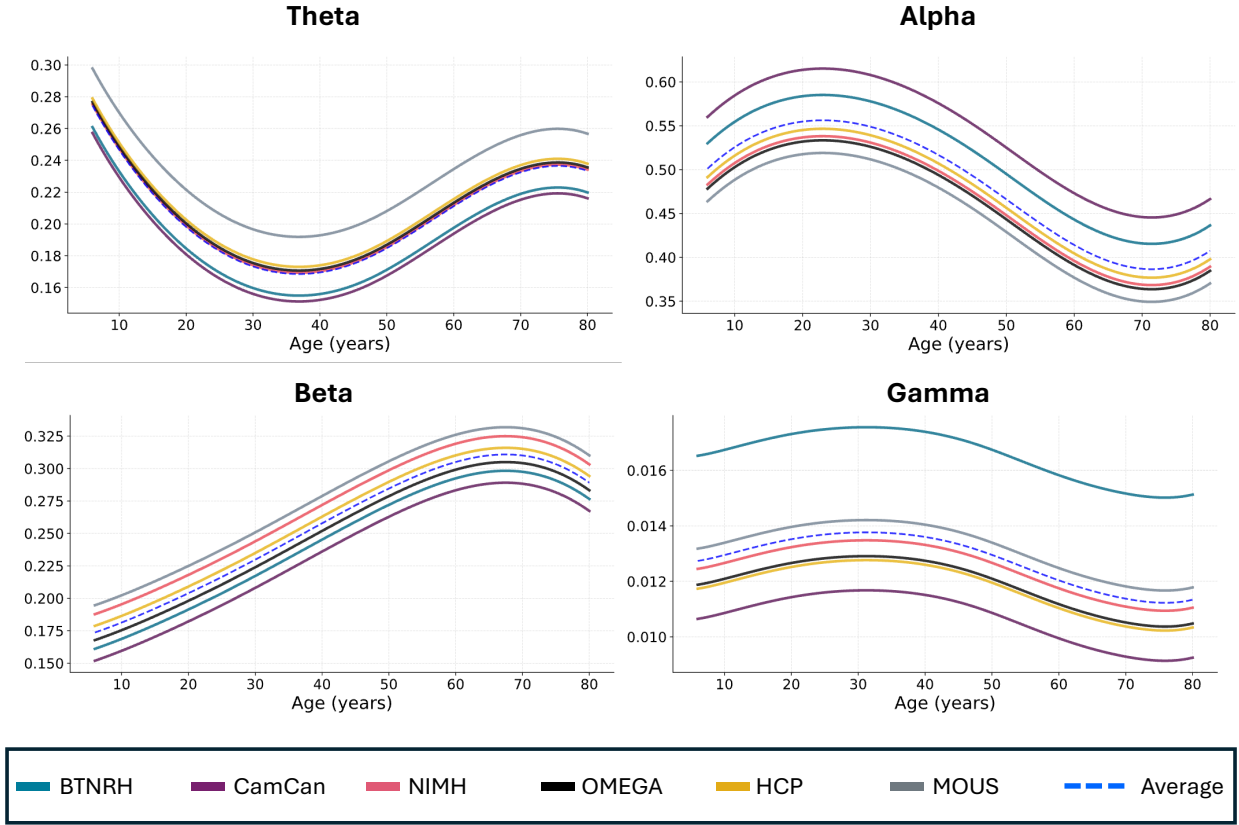

**Supplementary Figure 2:** Lifespan 50<sup>th</sup> centile trajectory of f-IDPs in males across six sites. The 50<sup>th</sup> centile for each site is estimated by drawing samples from the posterior predictive distribution. Additionally, the average trajectory across sites is represented by a blue dashed line. The MOUS, OMEGA, and HCP datasets that were recorded in the eyes-closed condition exhibit a lower relative alpha power compared to the average.

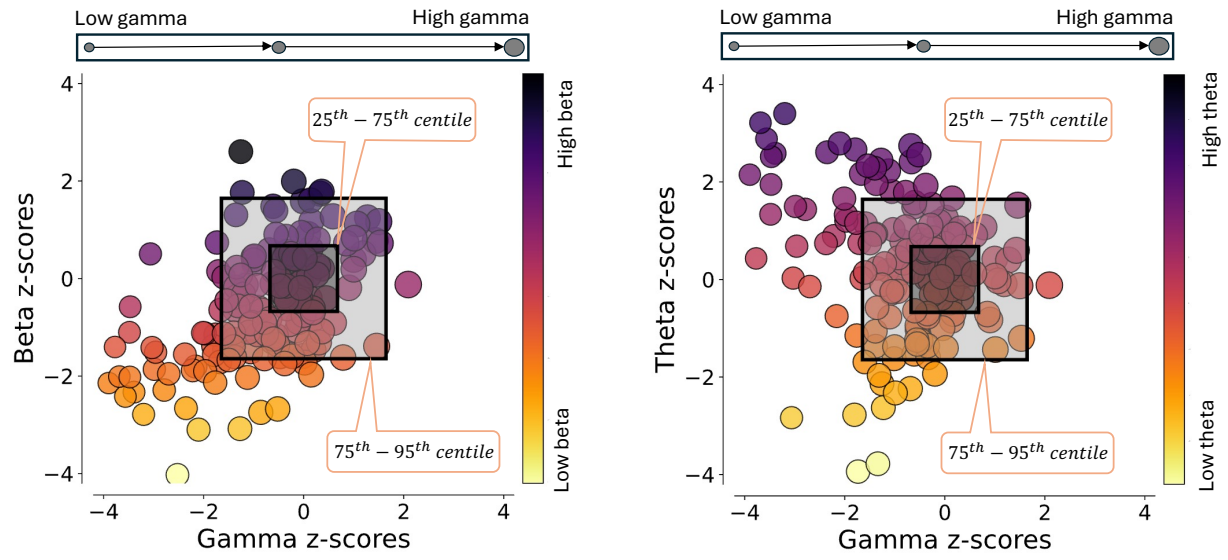

**Supplementary Figure 3:** Scatter plot of the distribution of Parkinson's disease patients in gamma-beta and gamma-theta deviation space. The scatter plots highlight the heterogeneity in the patient population as spectra. Marker size represents the x-axis values, while the color map corresponds to the y-axis values.

## References

- [1] M Chris Jones and Arthur Pewsey. Sinh-arcsinh distributions. *Biometrika*, 96(4):761–780, 2009.
- [2] Augustijn AA de Boer, Johanna MM Bayer, Seyed Mostafa Kia, Saige Rutherford, Mariam Zabihi, Charlotte Fraza, Pieter Barkema, Lars T Westlye, Ole A Andreassen, Max Hinne, et al. Non-gaussian normative modelling with hierarchical bayesian regression. *Imaging Neuroscience*, 2:1–36, 2024.
